# Supplementary material
Source: PubMed Central journal article supplement (PMC6735420)
Supplement: jamainternmed-179-1624-s003.pdf [file jamainternmed-179-1624-s003.pdf]

## **Data Sharing Statement**

Patel. Effectiveness of Behaviorally Designed Gamification Interventions With Social Incentives for Increasing Physical Activity Among Overweight and Obese Adults Across the United States. *JAMA Intern Med*. Published September 09, 2019.  
10.1001/jamainternmed.2019.3505

### **Data**

**Data available:** No
